1 **Coalescent models at small effective population sizes and population declines**  
2 **are positively misleading**

3 Corresponding author:

4 M. Elise Lauterbur<sup>1</sup>

5 Department of Ecology and Evolution

6 Stony Brook University

7 Stony Brook, NY 11794

1 1 Address as of August 2019: Department of Ecology and Evolutionary Biology, University of Arizona,  
2 Tucson, AZ 85721

8 Running title: **Coalescent models of small populations**

9 Corresponding author:

10 M. Elise Lauterbur

11 650 Life Sciences Building

12 Department of Ecology and Evolution

13 Stony Brook University

14 Stony Brook, NY 11794

15 (217) 649-2566

16 [lauterbur@gmail.com](mailto:lauterbur@gmail.com)

17 **Keywords:** Coalescent, effective population size, conservation, bottleneck

## 18 **Abstract**

19 Population genetics employs two major models for conceptualizing genetic relationships  
20 among individuals – outcome-driven (coalescent) and process-driven (forward). These  
21 models are complementary, but the basic Kingman coalescent and its extensions make  
22 fundamental assumptions to allow analytical approximations: a constant effective  
23 population size much larger than the sample size. These make the probability of  
24 multiple coalescent events per generation negligible. Although these assumptions are  
25 often violated in species of conservation concern, conservation genetics often uses  
26 coalescent models of effective population sizes and trajectories in endangered species.  
27 Despite this, the effect of very small effective population sizes, and their interaction with  
28 bottlenecks and sample sizes, on such analyses of genetic diversity remains  
29 unexplored. Here, I use simulations to analyze the influence of small effective  
30 population size, population decline, and their relationship with sample size, on  
31 coalescent-based estimates of genetic diversity. Compared to forward process-based  
32 estimates, coalescent models significantly overestimate genetic diversity in  
33 oversampled populations with very small effective sizes. When sampled soon after a  
34 decline, coalescent models overestimate genetic diversity in small populations  
35 regardless of sample size. Such overestimates artificially inflate estimates of both  
36 bottleneck and population split times. For conservation applications with small effective  
37 population sizes, forward simulations that do not make population size assumptions are  
38 computationally tractable and should be considered instead of coalescent-based  
39 models. These findings underscore the importance of the theoretical basis of analytical  
40 techniques as applied to conservation questions.

## 41 Introduction

42 Inferring how a population evolves or has evolved under circumstances of interest is a  
43 key goal of population genetics. To understand the dynamics of real-world populations,  
44 we often turn to analytically and computationally tractable coalescent models of Wright-  
45 Fisher population genetics, with the standard being the Kingman coalescent (1982a,  
46 1982b). These models allow the estimation and simulation of current and past  
47 population genetic parameters of interest, perhaps foremost among them, genetic  
48 diversity or  $\theta = 4N_e\mu$  (Fu and Li 1993; Fu and Li 1999).

49 Coalescent theory in its standard form (Kingman 1982a, 1982b) both makes certain  
50 simplifying assumptions that allow its analytical elegance, and remains the typical model  
51 used to interpret genetic variation. These include a stable effective population size large  
52 enough to be effectively infinite, that is much larger than the sample size. This is  
53 because of the fundamental simplifying assumption that only two lineages coalesce per  
54 generation. However when the effective population size is very small ( $N_e < 1000$ ),  
55 and/or the sample size approaches or exceeds the effective population size, the  
56 probability of more than two lineages coalescing in a single generation (multiple  
57 mergers) increases exponentially (figure 1) (Wakeley 2016).

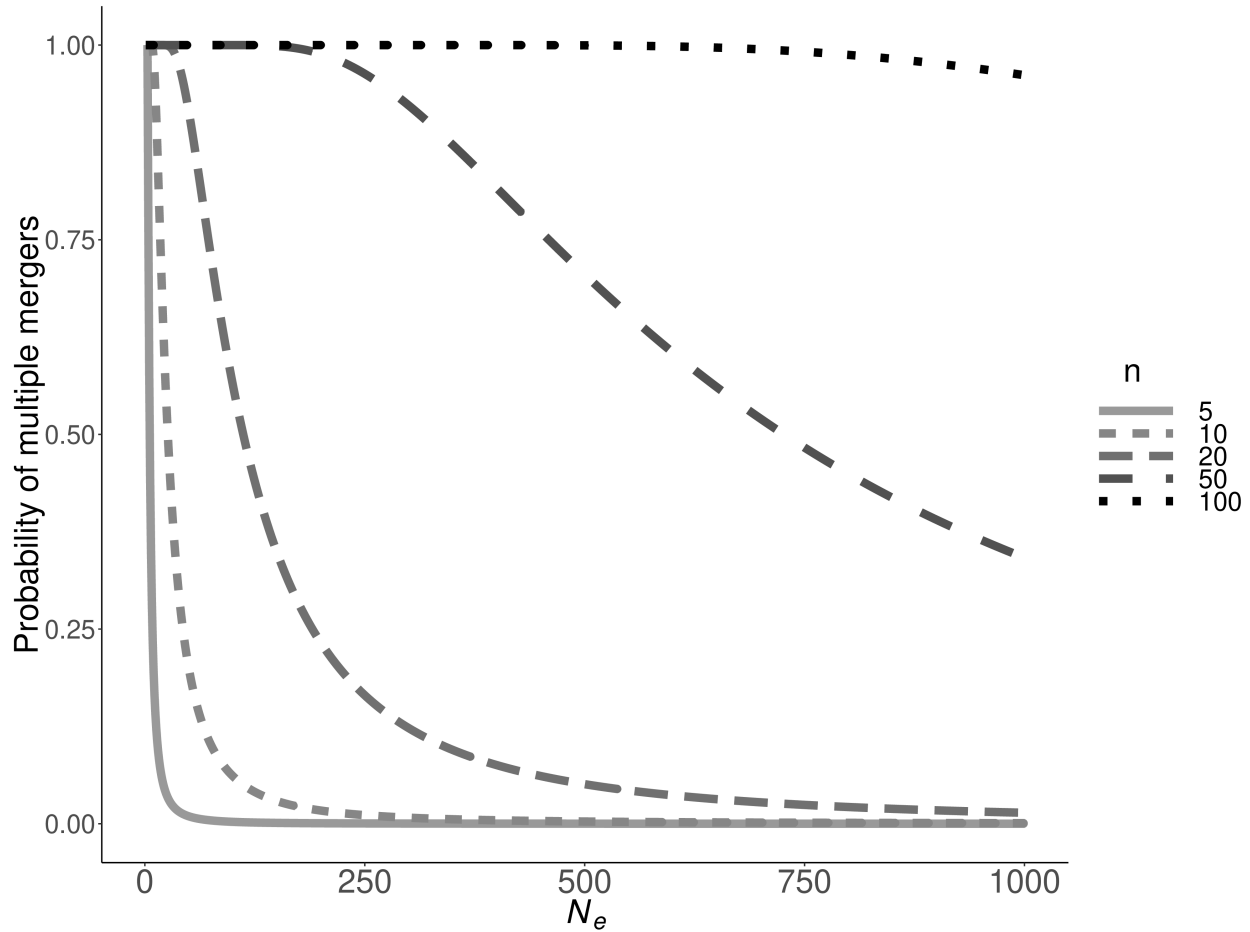

58 Figure 1. Effective population size and multiple merger probability. The probability that  
59 more than two lineages coalesce per generation (multiple mergers) as a function of  
60 sample size ( $n$ ) and effective population size from  $N_e = 0$  to 1000.

61 In species of conservation concern, as well as widely-sampled species such as  
62 humans, one or more of these assumptions (large  $N_e$ ,  $N_e \gg n$ , stable  $N_e$ ) are often  
63 unmet. For example, in a sample of 138 studies of species with genetically estimated  
64 effective population sizes, Palstra and Ruzzante (2008) found 120 species to have  
65 estimated effective population sizes of less than 1000, and 27 to have effective

66 population sizes of less than 100. Included among these are a population North Sea  
67 cod (*Gadus morhua*) off the Yorkshire coast of England, with an effective population  
68 size of 70 - 120 depending on sampling period (Hutchinson et al. 2003); Brazilian water  
69 hyacinth (*Eichhornia paniculata*) in northeastern Brazil, with an effective population size  
70 of < 5 - 70 depending on the population sampled (Husband and Barrett 1992); and the  
71 Siberian tiger (*Panthera tigris altaica*) with an effective population size of approximately  
72 14 (Alasaad et al. 2011).

73 Given these small  $N_e$ , some species and populations may be oversampled relative to  
74 effective population size. For example, the hihi (*Notiomystis cincta*) of New Zealand was  
75 estimated to have an effective population size of 10 and a census size of 30 after  
76 reintroduction to Mokoia island (Castro et al. 2004). In this case, because of banding  
77 and monitoring, it was possible to sample the entire population, and thus have a sample  
78 size three times that of the effective population size. Estimates of human effective  
79 population sizes vary depending on population(s) and method of estimation, but are  
80 generally in the range of a few thousand to ~15,000 (Tenesa et al. 2007; Mezzavilla  
81 2015; The 1000 Genomes Project Consortium 2015). This means that current human  
82 research involving samples of tens or even hundreds of thousands of individuals (eg.  
83 Mazet et al. 2016; Martin et al. 2017) is also likely to be oversampled relative to  
84 effective population size.

85 As in humans, small effective population sizes are often the result of population  
86 bottlenecks. Bottlenecks are characteristic of populations of conservation concern as

87 well as the founding of new populations. Immediately after a bottleneck, genetic  
88 diversity, as measured by descriptive statistics involving the number of alleles, such as  
89 Watterson's theta ( $\theta_w$ ), drops precipitously (Maruyama and Fuerst 1985; Leberg 1992).  
90 This is because of the immediate loss of rare alleles, particularly singletons. In contrast,  
91 heterozygosity is reduced less immediately after a bottleneck, but continues to fall if the  
92 bottleneck is prolonged (Allendorf 1986).

93 The robustness of coalescent theory to violations of theoretical assumptions has been  
94 relatively well-studied with respect to sample size, migration, population size  
95 fluctuations, and variation in reproductive success, among others. For example,  
96 Wakeley and Takahashi (2003) and Bhaskar et al. (2014) found that large sample sizes,  
97 relative to the effective population size, increase the proportion of singleton  
98 polymorphisms relative to standard coalescent expectations. Bhaskar et al. (2014) were  
99 able to attribute this directly to multiple mergers in oversampled genealogies. In  
100 addition, variance in reproductive success can also result in multiple coalescent events  
101 per generation, and increases the complexity of the relationship between effective  
102 population size and the per-locus neutral mutation rate (Eldon and Wakeley 2005).  
103 Migration and recolonization in metapopulations also causes skew in the site frequency  
104 spectrum (Wakeley and Aliacar 2001). In these cases, deviations are attributable to  
105 multiple mergers.

106 Intuition might suggest that very small effective population sizes could have the same  
107 effects on parameter inference as do other violations resulting in multiple mergers, but

108 the exact nature of the consequences and how they interact with population bottlenecks  
109 remains unexplored. As previously suggested, application of multiple merger coalescent  
110 models could resolve erroneous estimates of population genetic parameters in  
111 populations that violate assumptions of the standard coalescent (Schweinsberg 2000;  
112 Mohle and Sagitov 2003; Eldon and Wakeley 2005; Birkner and Blath 2008; Tellier and  
113 Lemaire 2014; Koskela, Jenkins, and Spano 2015; Montano 2016). However, if and how  
114 this applies to populations with very small effective population sizes ( $N_e < 1000$ ) and  
115 bottlenecks has so far been neglected.

116 Here, I use simulations to examine the effect of small effective population sizes and  
117 population declines, and their interaction with sample size, on coalescent estimates of  
118 genetic diversity. I compare coalescent estimates of genetic diversity to genetic diversity  
119 generated by forward simulations for a range of constant effective population sizes  
120 between  $N_e = 10$  and 1000, and a range of sample sizes between  $n = 2$  and 1000. This  
121 includes scenarios of oversampling: parameter spaces in which the sample size  
122 approaches and even exceeds the effective population size ( $n > N_e$ ). Because small  
123 effective population sizes are often the result of more or less recent bottlenecks, I  
124 extend the simulations to include bottlenecks of severity ranging from 0% to 99% and  
125 sampling times (without recovery) between  $T = 1$  and 1000 generations post-bottleneck.  
126 These comparisons show that coalescent models tend to incorrectly estimate genetic  
127 diversity when effective population sizes are very small and when sample size exceeds  
128 effective population size. These effects are especially pronounced after a recent  
129 bottleneck.



130 **Materials and Methods**

131 To ascertain the reliability of coalescent-based estimates of genetic diversity at low  
 132 effective population sizes ( $N_e < 1000$ ) and sample sizes ( $n$ ) approaching  $N_e$ , both with  
 133 and without bottleneck at varying times ( $T$ ), I used forward, process-based simulations  
 134 to ground-truth coalescent simulations (table 1). Unlike coalescent simulations, which  
 135 probabilistically model the history of a sample backward in time, Wright-Fisher forward  
 136 simulations follow the entire population of individuals generation by generation from the  
 137 beginning of the simulation until it ends and individuals are sampled (eg. Hernandez  
 138 2008; Haller and Messer 2017, 2019).

139 Table 1. Explored parameter space of  $N_e$  and  $n$ , with approximate relationship between  
 140  $N_e$  and  $n$  in the cells.

| $n   N_e$ | 10          | 20          | 50          | 100         | 200         | 500         | 1000        |
|-----------|-------------|-------------|-------------|-------------|-------------|-------------|-------------|
| 2         | $n < N_e$   | $n \ll N_e$ | $n \ll N_e$ | $n \ll N_e$ | $n \ll N_e$ | $n \ll N_e$ | $n \ll N_e$ |
| 5         | $n < N_e$   | $n < N_e$   | $n \ll N_e$ | $n \ll N_e$ | $n \ll N_e$ | $n \ll N_e$ | $n \ll N_e$ |
| 10        | $n = N_e$   | $n < N_e$   | $n < N_e$   | $n \ll N_e$ | $n \ll N_e$ | $n \ll N_e$ | $n \ll N_e$ |
| 20        | $n > N_e$   | $n = N_e$   | $n < N_e$   | $n < N_e$   | $n \ll N_e$ | $n \ll N_e$ | $n \ll N_e$ |
| 50        | $n > N_e$   | $n > N_e$   | $n = N_e$   | $n < N_e$   | $n < N_e$   | $n \ll N_e$ | $n \ll N_e$ |
| 100       | $n \gg N_e$ | $n > N_e$   | $n > N_e$   | $n = N_e$   | $n < N_e$   | $n < N_e$   | $n \ll N_e$ |
| 200       | $n \gg N_e$ | $n \gg N_e$ | $n > N_e$   | $n > N_e$   | $n = N_e$   | $n < N_e$   | $n < N_e$   |
| 500       | $n \gg N_e$ | $n \gg N_e$ | $n \gg N_e$ | $n > N_e$   | $n > N_e$   | $n = N_e$   | $n < N_e$   |
| 1000      | $n \gg N_e$ | $n \gg N_e$ | $n \gg N_e$ | $n \gg N_e$ | $n > N_e$   | $n > N_e$   | $n = N_e$   |

## 141 *Simulations*

142 Forward simulations were performed using SFS\_CODE (Hernandez 2008) and SLiM v2  
143 (Haller and Messer 2017), and coalescent simulations were performed with Hudson's  
144 ms (Hudson 2002). I performed 10,000 simulations of each parameter combination  $\{N_e,$   
145  $n, T\}$  with SFS\_CODE and Hudson's ms. SLiM v2 was used to verify the SFS\_CODE  
146 results by performing 10,000 simulations of each parameter combination  $\{N_e, n\}$  to  
147 mutation-drift equilibrium. Effective population size  $N_e$  could take the values  $\{10, 20, 50,$   
148  $100, 200, 500, 1000\}$ , and sample size  $n$  the values  $\{2, 5, 10, 20, 50, 100, 200, 500,$   
149  $1000\}$ , chosen to reflect plausible effective population sizes of populations of  
150 conservation concern. For the forward simulations, when sample size exceeded  
151 effective population size, individuals were resampled until the sample size was reached.  
152 The non-bottleneck simulations were run with constant  $N_e = \{10, 20, 50, 100, 200, 500,$   
153  $1000\}$ , and forward simulations were run with a burn-in of  $10 * 2N_e$ .

154 For the bottleneck simulations, pre-bottleneck  $N_e = 1000$ , since preliminary simulations  
155 showed no significant differences between forward and coalescent diversity estimates  
156 at  $N_e = 1000$ , and because forward simulations were computationally impractical at  $N_e >$   
157  $1000$ . The bottleneck reduced the population to one of the above set of possible  $N_e$   
158 values at  $T = \{1, 10, 100, 1000\}$  generations, resulting in sampling times ranging from 1  
159 to 1000 generations after the bottleneck event. There was no post-bottleneck recovery  
160 of  $N_e$ . For both non-bottleneck and bottleneck scenarios, a 5,000-base-pair locus was  
161 simulated with mutation rate  $= 4N_e * 10^{-6}$  and recombination rate  $= 4N_e * 10^{-8}$  per bp.  
162 See table 1 for  $\{N_e, n\}$  parameter space.

163 Since rare variants are lost first during a bottleneck, which reduces the number of  
164 segregating sites, Watterson's  $\theta$  ( $\theta_w$ ) is an appropriate and sensitive summary statistic  
165 for comparing genetic diversity estimated by each type of simulation (Allendorf 1986). It  
166 is also commonly used in studies of genetic diversity both within and among  
167 populations. I compared  $\theta_w$  estimated by each type of simulation at each parameter  
168 combination  $\{N_e, n, T\}$ .

### 169 *Statistical comparisons*

170 Each set of 10,000 simulations per parameter combination  $\{N_e, n, T\}$  and simulation  
171 type (forward, coalescent) created a distribution of estimated  $\theta_w$  values. At small  $N_e$ , the  
172 distributions of the number of segregating sites, thus  $\theta_w$ , is zero-inflated, and parametric  
173 tests are inappropriate. To compare mean  $\theta_w$  among coalescent and both forward  
174 simulators for each set of simulations with the same parameter combination (without a  
175 bottleneck), I used Kruskal-Wallis tests followed by a post-hoc Dunn's test for each  
176 significant case. For the bottleneck scenarios, I used Kolmogorov-Smirnov tests to  
177 compare the distributions, and Mann-Whitney U tests to determine if the coalescent and  
178 forward samples could have come from a distribution with the same mean  $\theta_w$ , between  
179 pairs of forward-coalescent distributions created with the same parameter combination.  
180 All p-values were converted to false discovery rate (FDR) with a threshold of 0.001 to  
181 control for multiple comparisons.

### 182 *Data Availability*

183 Supplementary tables have been uploaded to figshare, and code and data for analyses have

184 been uploaded to <https://github.com/lauterbur/Ne>.

## 185 **Results**

### 186 *Constant small effective population size*

187 There were few differences between genetic diversity (as measured by Watterson's  $\theta$ )  
188 calculated from both forward simulators, SFS\_CODE and SLiM v2. The post-hoc  
189 Dunn's test showed false discovery rates (FDR) under the 0.001 threshold only  
190 occurred for 4 out of 63 comparisons (6%). Thus, only comparisons between  
191 SFS\_CODE (forward) and Hudson's ms (coalescent) are shown and used for  
192 subsequent bottleneck analyses (Table S1).

193 For those scenarios in which significant differences between  $\theta_w$  calculated from  
194 SFS\_CODE and SLiM simulations were found, these differences were 16-30% the  
195 magnitude of differences between the coalescent estimate and either forward  $\theta_w$ . All  
196 such scenarios had sample sizes approximately double the effective population size  
197 ( $\{N_e = 100, n = 200\}$ ,  $\{N_e = 200, n = 500\}$ ,  $\{N_e = 500, n = 1000\}$ ). Hence, the discrepancy  
198 could be an effect of the resampling of individuals performed when sample size exceeds  
199 effective population size.

200 At constant effective population size, statistically significant differences between  $\theta_w$   
201 estimated by coalescent models and calculated from forward models were most  
202 pronounced when sample size was much different from effective population size  
203 (Kruskal Wallis FDR < 0.001 and Dunn's FDR < 0.001). When  $N_e \geq n$ , the coalescent  
204 overestimated genetic diversity, and when  $N_e < n$ , the coalescent underestimated

204 genetic diversity (figure 3).

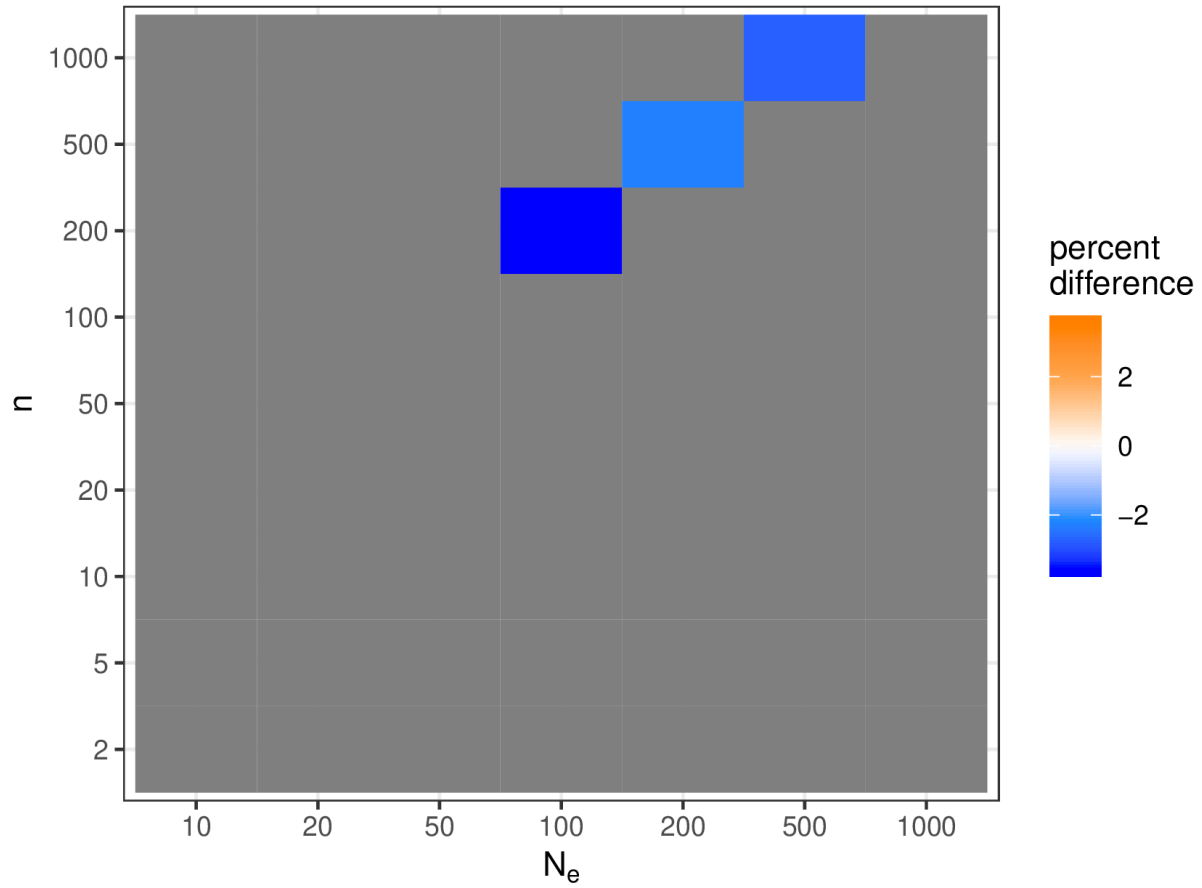

205 Figure 2. Significant differences between  $\theta_w$  values for SLiM and SFS\_CODE. Grey  
206 indicates no significant difference, colors indicate significant differences with darker  
207 oranges associated with larger mean percent differences.

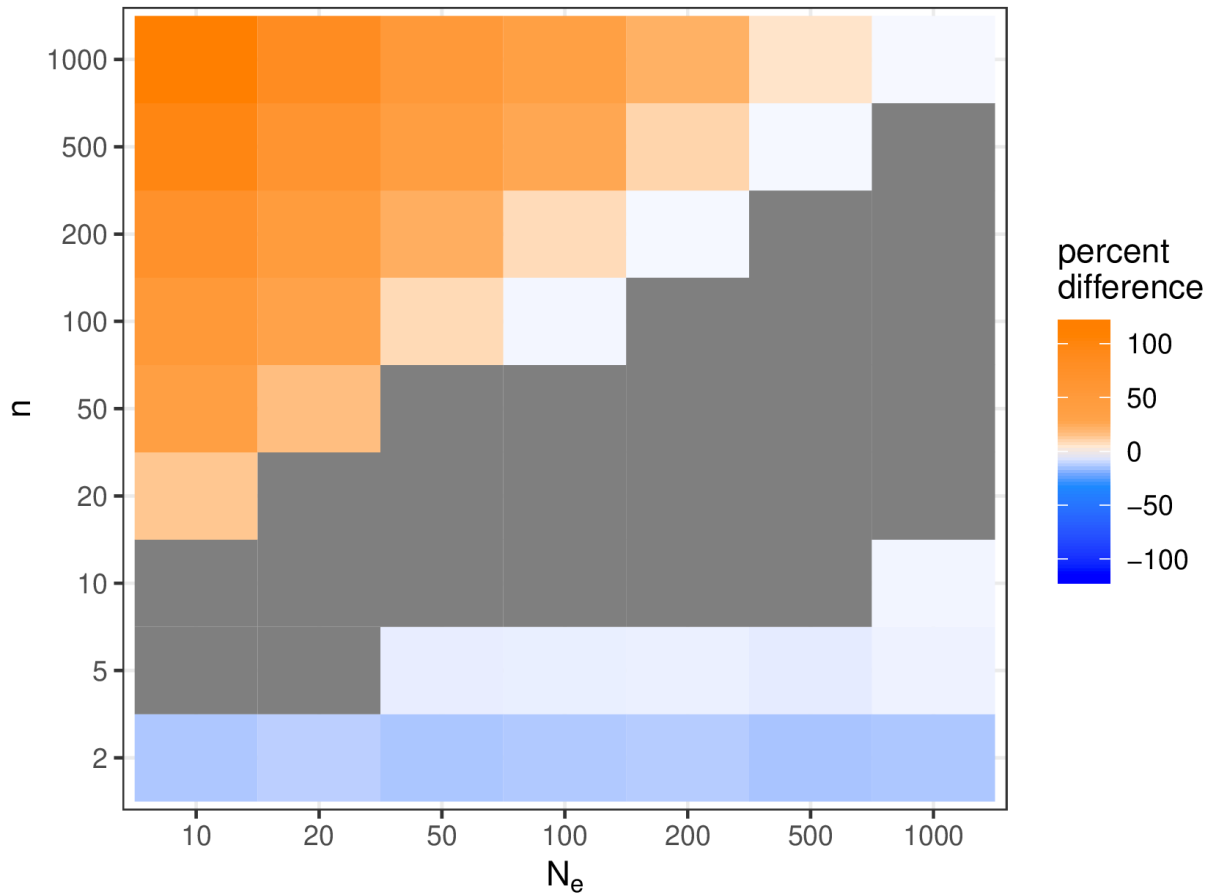

208 Figure 3. Significant differences between  $\theta_w$  values for forward (SFS\_CODE) and  
209 coalescent (ms) simulations. Grey indicates no significant difference, colors indicate  
210 significant differences with darker oranges associated with larger mean positive percent  
211 differences and darker blues associated with larger mean negative percent differences.

212 The relationship between sample size ( $n$ ) and effective population size ( $N_e$ ) influenced  
213 the result of forward to coalescent comparisons of genetic diversity. At small  $n/N_e$  ratios  
214 ( $\leq 0.1$ ), coalescent simulations were more likely to underestimate  $\theta_w$  by up to  
215 13%, especially at small  $N_e$ , while at large  $n/N_e$  ratios ( $\geq 2.0$ ) coalescent

216 simulations were more likely to overestimate  $\theta_w$  by up to 60% (figure 4)

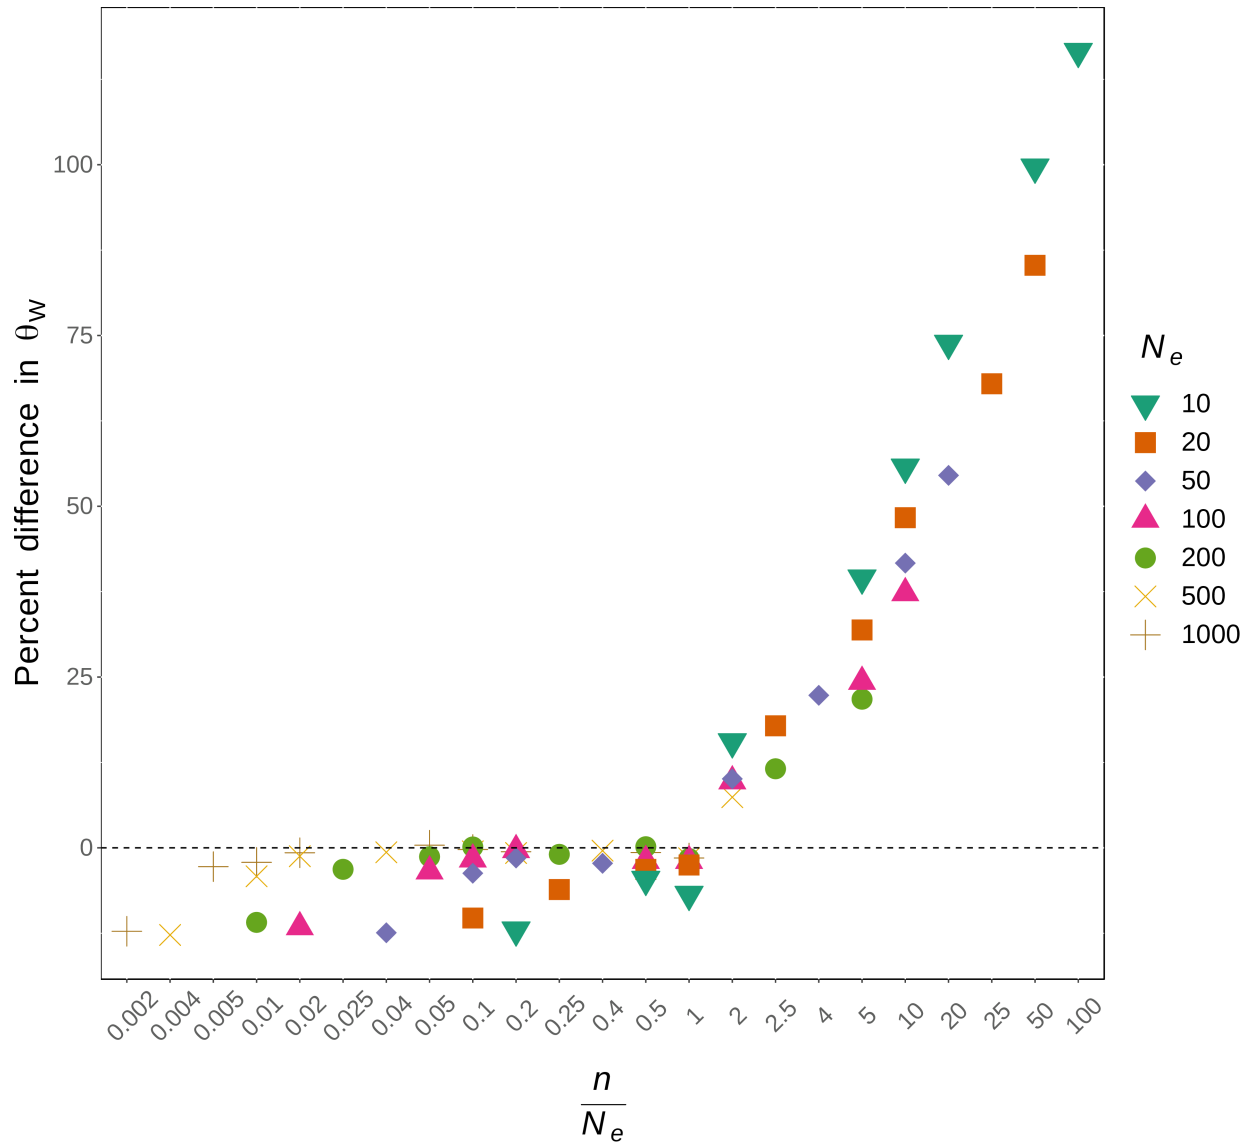

217 Figure 4. The effect of the relationship between sample size and effective population  
218 size ( $n/N_e$ ) on coalescent estimates of  $\theta_w$  relative to forward calculations of  $\theta_w$ . When  
219 the percent difference is positive, the coalescent estimate is larger and thus  
220 overestimating  $\theta_w$ , and when the percent difference is negative, the coalescent estimate  
221 is smaller and thus underestimating  $\theta_w$ .



222 *Bottlenecks to small effective population size*

223 The time between sampling and a population bottleneck in small populations had a  
224 greater effect on the accuracy of coalescent estimates of  $\theta_w$  than effective population  
225 size and its relationship with sample size in populations of constant size (Table S2).  
226 Immediately after a bottleneck ( $T = \{1, 10\}$ ), coalescent estimates of  $\theta_w$  overestimate  
227 genetic diversity at all effective population sizes except  $N_e = 1000$ , though not all  
228 comparisons at  $N_e = 200$  and  $N_e = 500$  are significant. At  $N_e = 1000$ , coalescent  
229 estimates underestimate genetic diversity (figure 5, figure 6). There was no effect of the  
230 relationship between sample size and effective population size at  $T = 1$ . At  $T = 10$  there  
231 was an effect only at the smallest effective population sizes ( $N_e = \{10, 20\}$ , figure 7a, b).

232 As the time since the bottleneck increases, coalescent estimates of  $\theta_w$  approach  
233 forward calculations of  $\theta_w$ . Despite this, there are still statistically significant differences  
234 between distributions and means of coalescent and forward  $\theta_w$ s (Kruskal Wallis and  
235 Mann-Whitney U tests FDR for most scenarios  $< 0.001$ , figure 5). For most scenarios at  
236  $T = 100$  and  $T = 1000$ , coalescent estimates overestimate  $\theta_w$  (figure 5, figure 8). At  
237 these longer times since the bottleneck, the relationship between sample size and  
238 effective population size becomes important (figure 7c, d). Since all bottlenecks were  
239 from a starting  $N_e = 1000$ , these comparisons do not distinguish between percent  
240 population size reduction during the bottleneck and final effective population size.

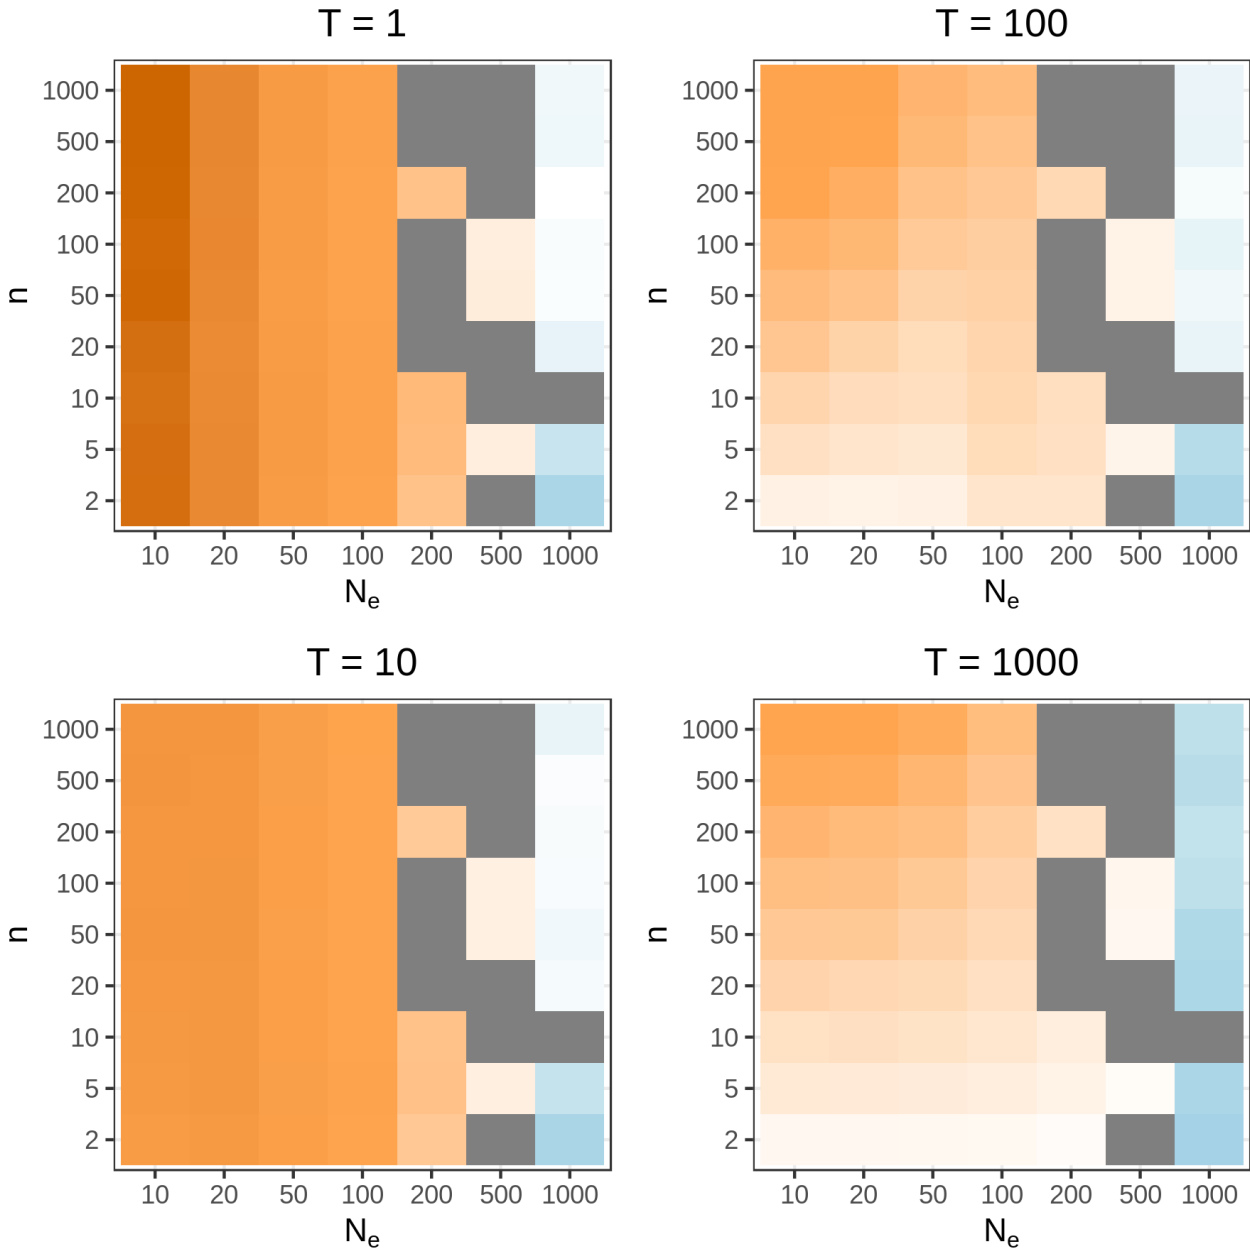

241 Figure 5. Significant differences between  $\theta_w$  values for forward (SFS\_CODE) and  
242 coalescent (ms) simulations, by time since bottleneck (T). Grey indicates no significant  
243 difference, colors indicate significant differences with darker oranges associated with  
244 larger mean positive percent differences and darker blues associated with larger mean  
245 negative percent differences.

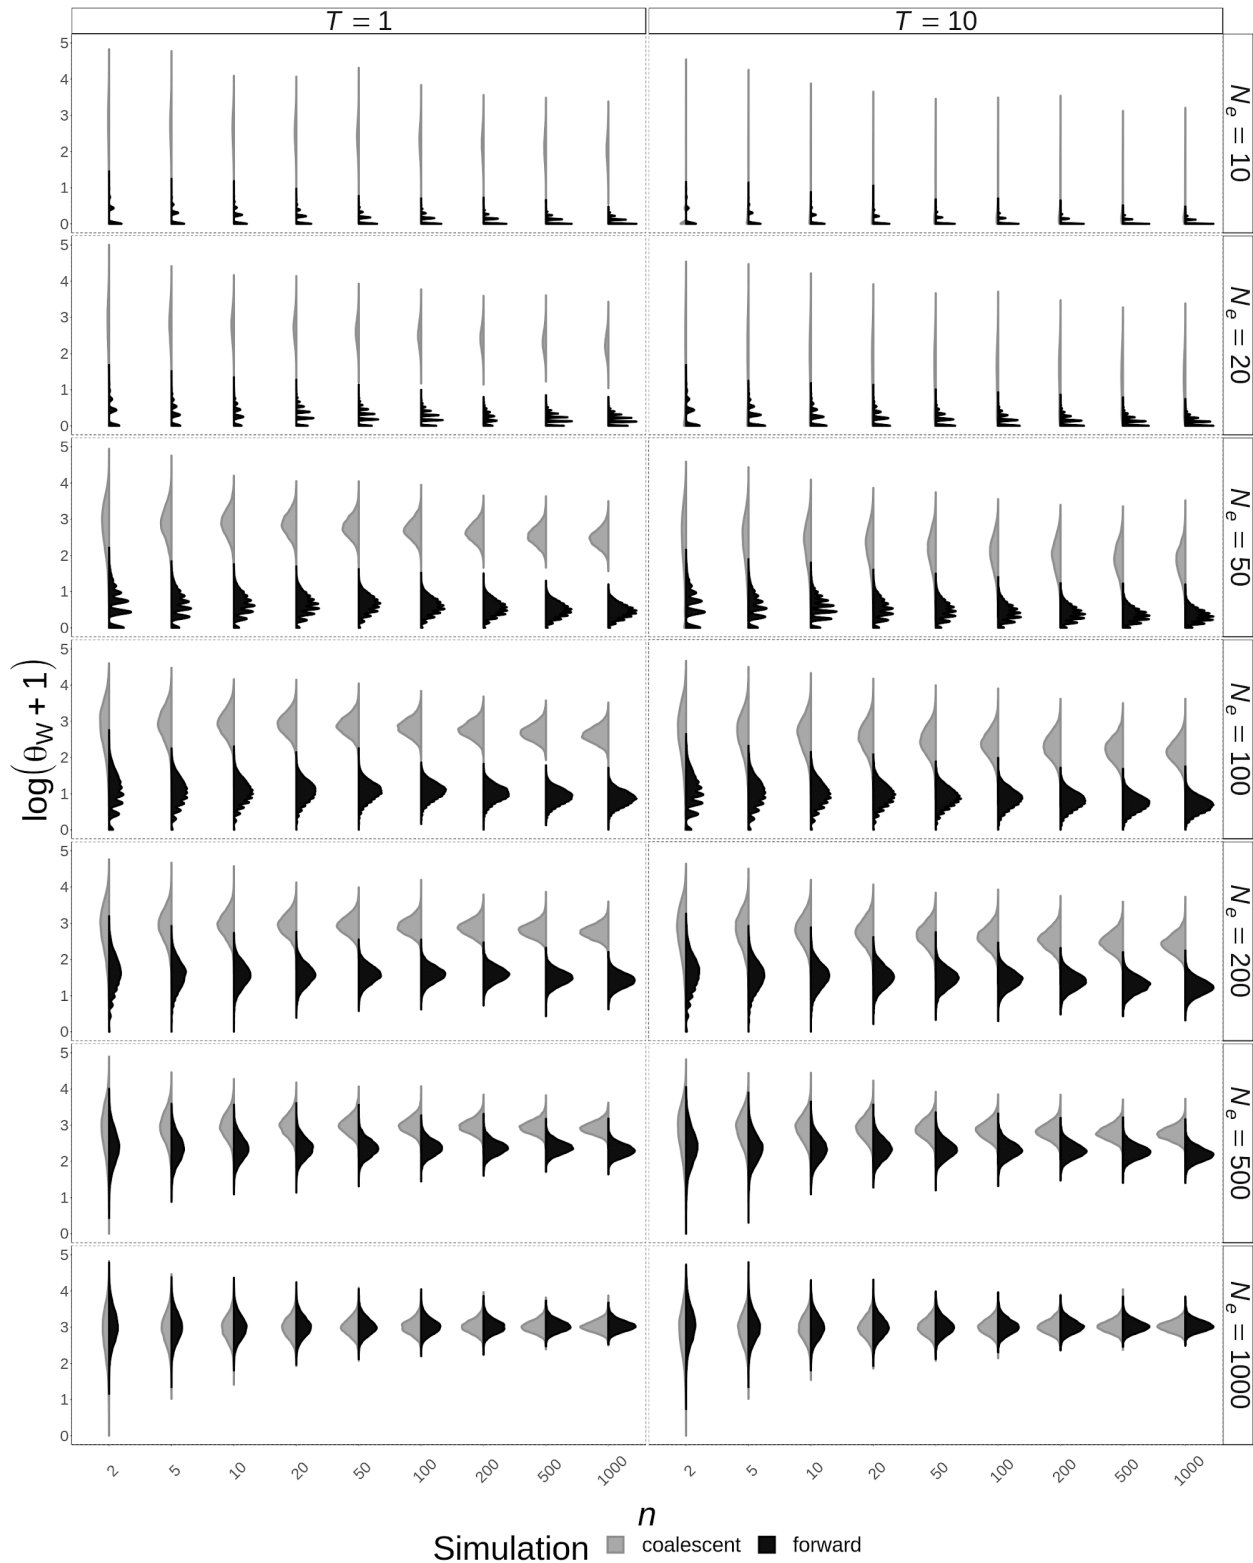

246 Figure 6. Distributions of  $\theta_w$  (log transformed for visibility) estimated from coalescent  
 247 simulations (grey) compared to  $\theta_w$  calculated from forward simulations (black), across

247 sample size (x axis) and effective population size (vertical facets) for  $T = 1$  (left) and  $T =$   
248 10 (right).

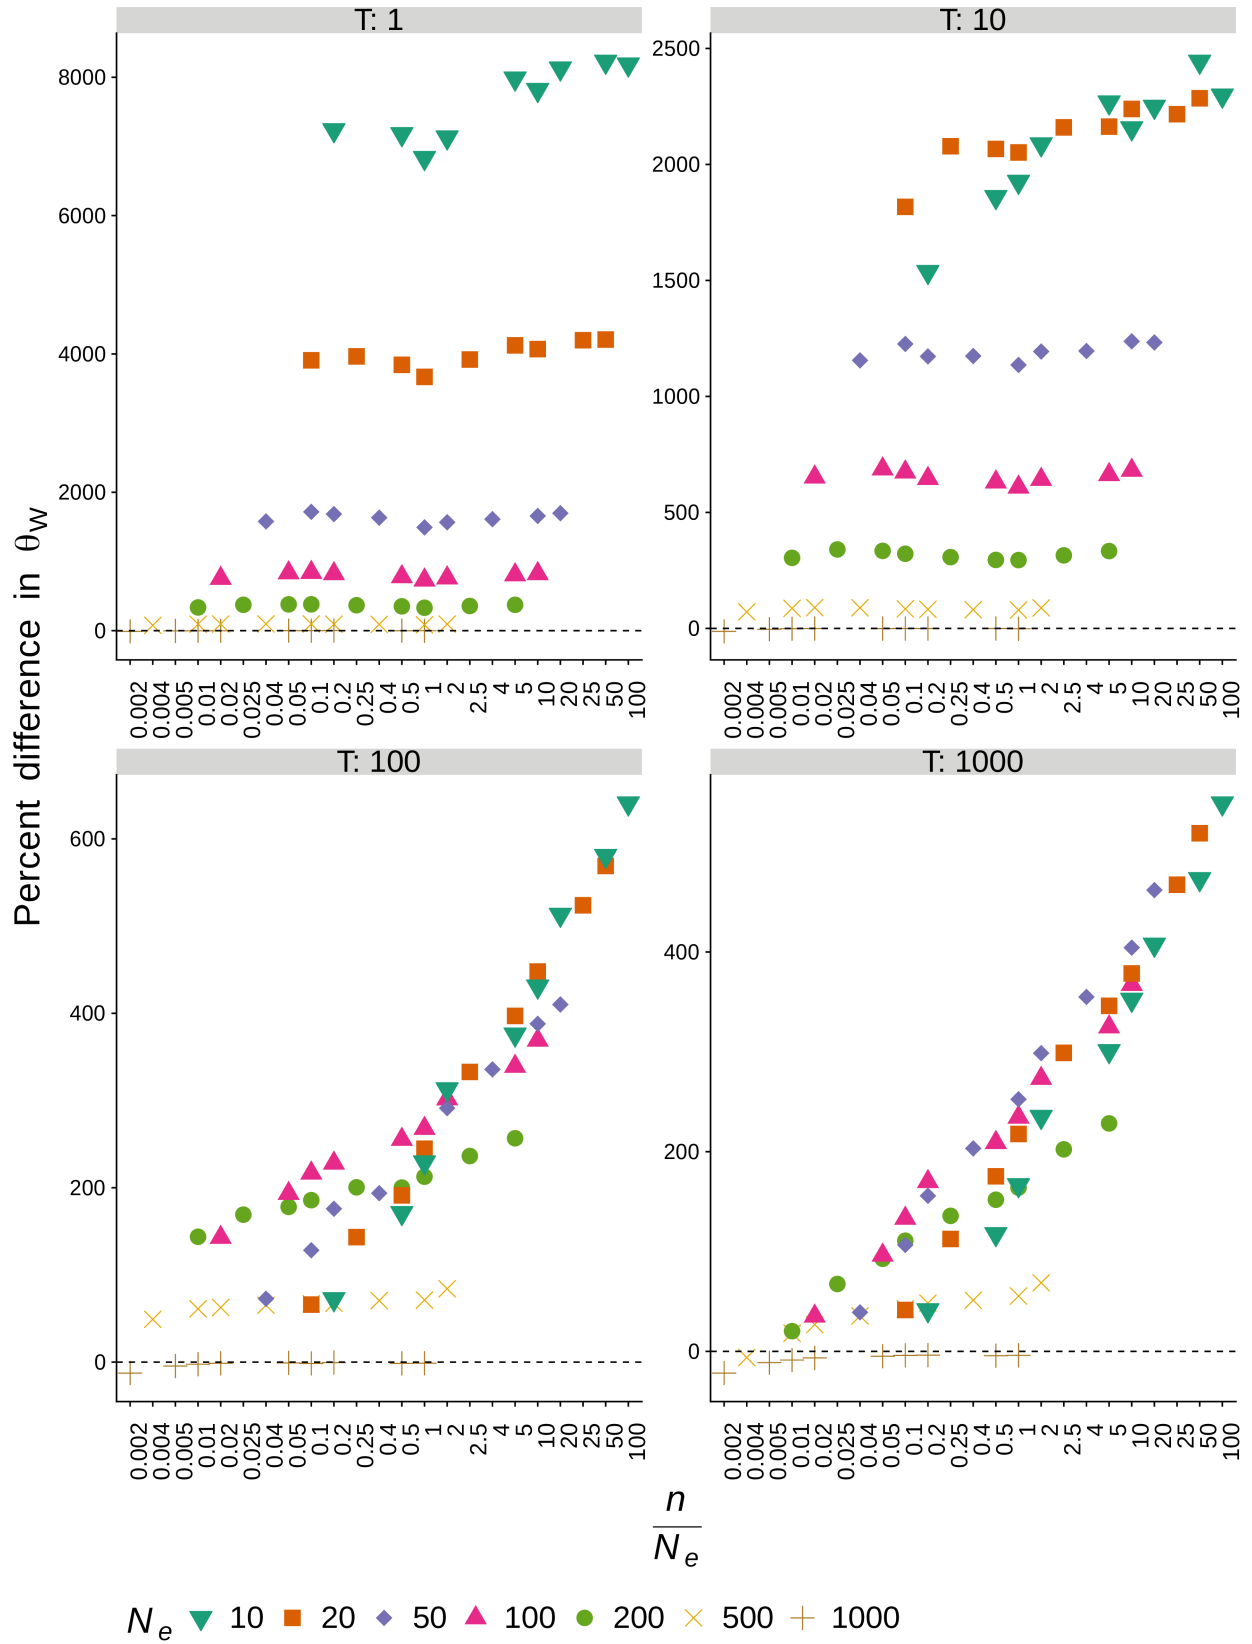

250 Figure 7. The effect of the relationship between sample size and effective population  
251 size ( $n/N_e$ ) on coalescent estimates of  $\theta_w$  relative to forward calculations of  $\theta_w$  at  
252 different sampling times after a bottleneck ( $T = \{1, 10, 100, 1000\}$ ). When the percent  
253 difference is positive, the coalescent estimate is larger and thus overestimating  $\theta_w$ , and  
254 when the percent difference is negative, the coalescent estimate is smaller and thus  
255 underestimating  $\theta_w$ . Note the scales of the y-axes of each panel are different for  
256 readability.

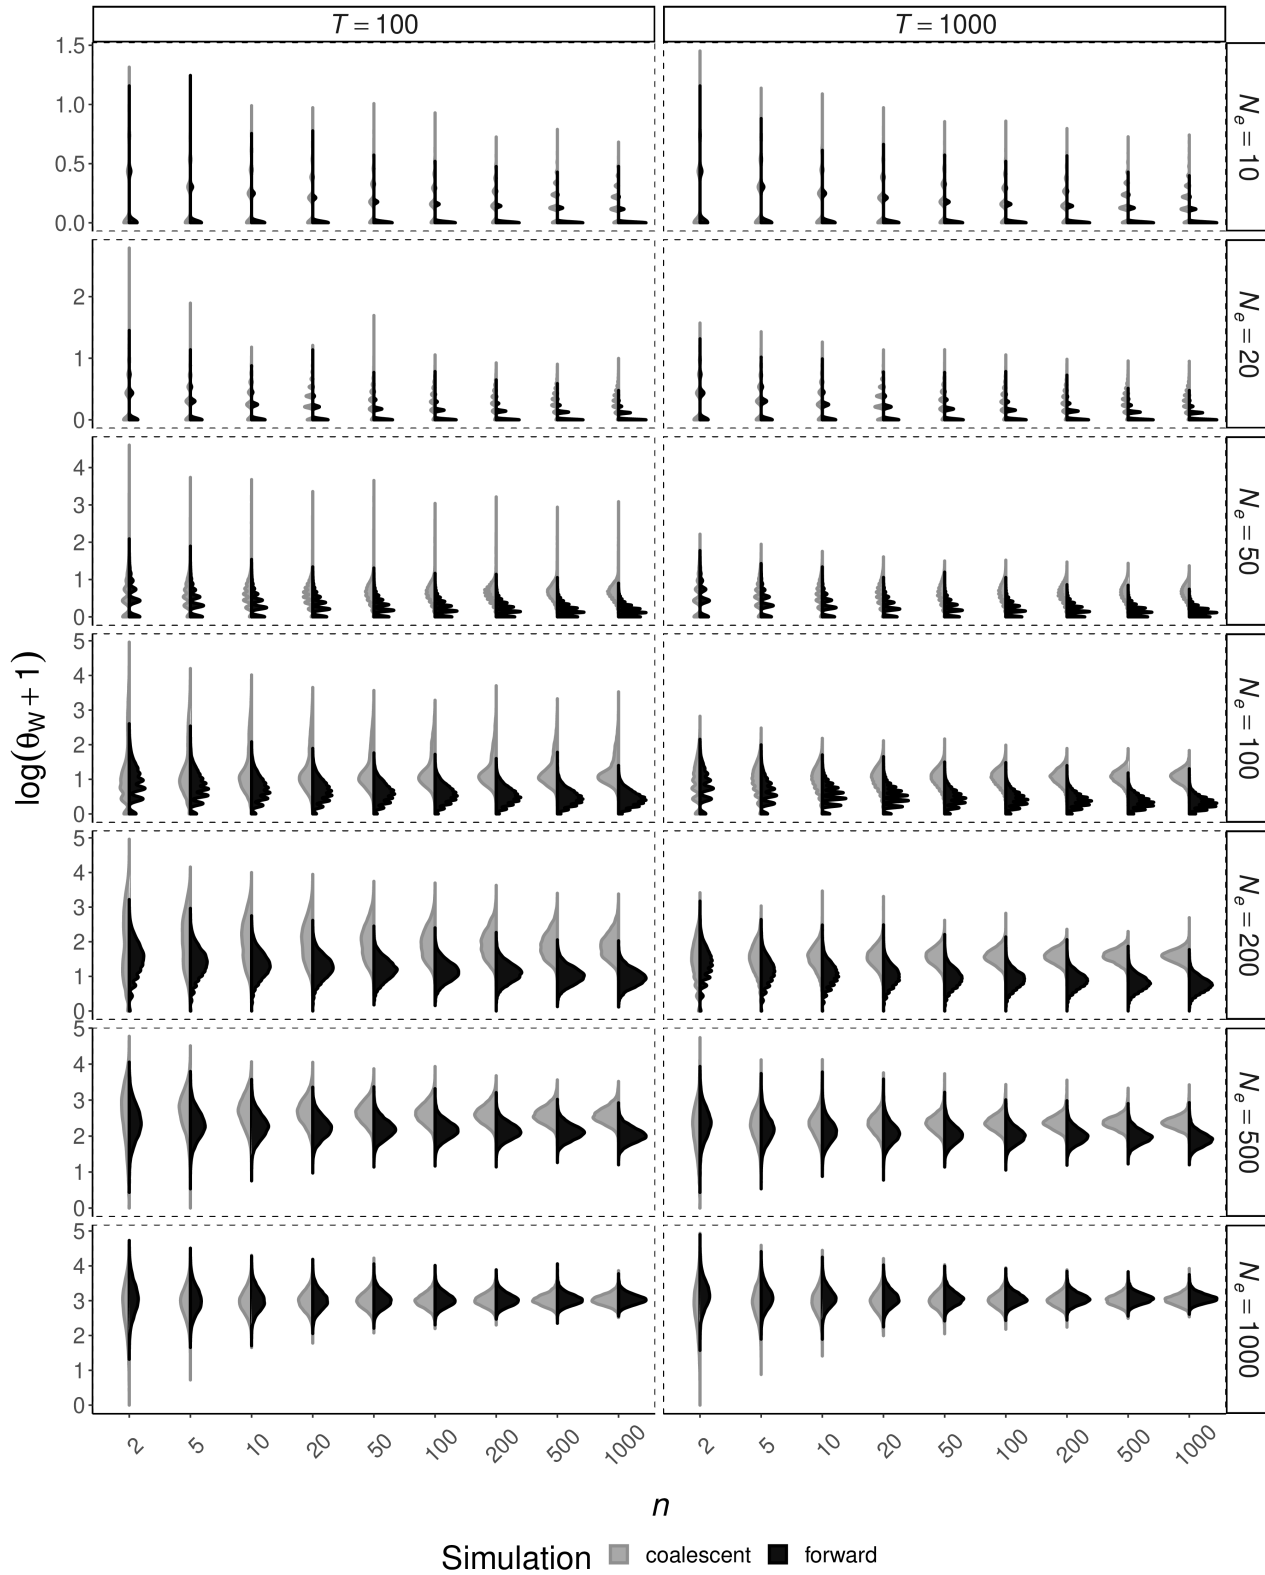

257 Figure 8. Distributions of  $\theta_w$  (log transformed for visibility) estimated from coalescent

258 simulations (grey) compared to  $\theta_w$  calculated from forward simulations (black), across  
259 sample size (x axis) and effective population size (vertical facets) for  $T = 100$  (left) and  
260  $T = 1000$  (right). Note the scales of the y-axes of each panel are different for readability.



## 261 **Discussion**

262 To determine if and how standard coalescent models influence estimates of genetic  
263 diversity in populations with small effective population sizes, this analysis compares  
264 genetic diversity estimates based on coalescent models to genetic diversity calculated  
265 in forward simulation ground-truths at a range of effective population sizes, sample  
266 sizes, and sampling times since a bottleneck. Coalescent models give unreliable  
267 estimates of genetic diversity, as measured by Watterson's  $\theta$ , regardless of the  
268 relationship between sample size and effective population size. This occurs particularly  
269 when the population is oversampled with respect to effective population size (sample  
270 size exceeds effective population size), and when sampled soon after a bottleneck.

271 The profound differences between coalescent estimates of  $\theta_w$  and forward calculations  
272 of  $\theta_w$  soon after a bottleneck show that applying standard coalescent models to  
273 bottlenecked populations can give misleading results. Overestimates would have the  
274 effect of fitting null coalescent models with incorrectly long times to the most recent  
275 common ancestor to estimates of  $\theta_w$  from real data, thus artificially extending estimates  
276 of both bottleneck times and population split times into the past. Underestimates of  $\theta_w$   
277 that occur after prolonged small effective population sizes would artificially shorten  
278 estimates of bottleneck times or population split times.

279 Bottlenecks are very common, both in species of conservation concern and others,  
280 including humans (Hey and Harris 1999). There have been suggestions that standard  
281 coalescent models would be inappropriate for bottlenecked populations because a

282 population bottleneck does not merely shorten branches (thus necessitating the  
283 rescaling of coalescent time), it increases the likelihood of multiple mergers (Wakeley  
284 and Aliacar 2001; Wakeley and Takahashi 2003). However, previous analyses have  
285 been restricted to metapopulations, which include migration and  
286 extinction/recolonization dynamics (Wakeley and Aliacar 2001), and the results herein  
287 show that coalescent models are inappropriate even for the simplest of bottlenecked  
288 populations.

289 The result that coalescent models overestimate  $\theta_w$  when  $n > N_e$  is corroborated by  
290 previous observations that when  $n > N_e$  the proportion of singleton polymorphisms  
291 increases relative to standard coalescent expectations (Wakeley and Takahashi 2003;  
292 Bhaskar, Clark, and Song 2014). Wakeley and Takahashi attribute this excess of  
293 singletons to mutations in the generation immediately previous to sampling, at a rate ( $\theta$   
294  $\ast n/N_e$ )/2. These mutations account for most of the singletons expected in the entire tree  
295 ( $E[S] = \theta$ ) (Watterson 1975).

296 Multiple merger coalescent models, which are more general than the Kingman  
297 coalescent, include the  $\Xi$ -,  $\Psi$ -, and  $\Lambda$ -coalescent (Irwin et al. 2016). These have been  
298 developed since the early 2000s, and vary in how they handle multiple merger events  
299 as well as the number of descendants per lineage (Árnason and Halldórsdóttir 2015).  
300 Though most of the development has so far been theoretical, potential applications to  
301 real-world multiple merger scenarios are clear (Schweinsberg 2000; Mohle and Sagitov  
302 2003; Eldon and Wakeley 2005; Birkner and Blath 2008; Tellier and Lemaire 2014;

303 Koskela, Jenkins, and Spano 2015; Montano 2016). At least one software package,  
304 Hybrid-Lambda, has been developed to allow the simulation of multiple merger trees,  
305 including conversion of the resulting branch lengths to coalescent estimates (Zhu et al.  
306 2015).

307 When applied to the limpet *Cellana ornata*, which has high reproductive skew, Zhu et al.  
308 (2015) showed that multiple merger coalescent models using the Hybrid-Lambda  
309 package estimated a population split time of approximately 9,000 generations with a  
310 multiple merger model vs. approximately 48,000 generations with the standard Kingman  
311 coalescent. Similarly, Árnasson and Halldórsdóttir (2015) applied  $\Xi$ - and  $\Lambda$ -coalescent  
312 null models (Eldon et al. 2015) to another species, Atlantic cod (*Gadus morhua*), whose  
313 high reproductive skew may have contributed to its small effective population size  
314 (Hutchinson et al. 2003). They found that previous population divergence time estimates  
315 may be too high because of inappropriate applications of the standard coalescent, and  
316 that multiple merger models may provide better null hypotheses for testing both split  
317 times and natural selection.

318 Despite the importance of exploring and applying multiple merger coalescent models for  
319 species with small effective population sizes and those subject to bottlenecks, a more  
320 expedient alternative when simulating null expectations is to use forward instead of  
321 coalescent simulations. Forward simulators require more computational resources than  
322 coalescent simulators, but effective population sizes of  $N_e = 1000$  and even larger can  
323 be manageable, even for tens of thousands of iterations. There are many forward

324 simulation options to choose from, including SFS\_CODE (Hernandez 2008), SLiM  
325 (Haller and Messer 2017, 2019), and fwdpp (Thornton 2014). SLiM v3 in particular  
326 supports non-Wright-Fisher models, which has the potential to extend our  
327 understanding of the dynamics of natural populations even further.

328 Loci from natural populations are typically sampled with ascertainment bias toward  
329 polymorphic sites. This would reduce or eliminate sites without polymorphisms, which  
330 account for most sites at small effective population sizes, and also accounts for some of  
331 the differences in mean  $\theta_w$  between coalescent and forward simulations. The resulting  
332 distributions of both coalescent and forward  $\theta_w$  would be biased upward, with reduced  
333 right skew. This has the potential to reduce apparent differences between coalescent  
334 and forward  $\theta_w$ . In addition,  $\theta_w$  is expected to be more sensitive to the immediate loss of  
335 rare variants (and thus segregating sites) caused by a bottleneck than some other  
336 commonly used summary statistics such as heterozygosity (Allendorf 1986). Like loci  
337 chosen with ascertainment bias, heterozygosity might also reduce the apparent  
338 differences between coalescent and forward  $\theta_w$ .

339 Since natural selection has the effect of reducing effective population sizes at (and  
340 near) loci under selection, these results have implications for tests for selection using  
341 coalescent-based null models. A similar effect has recently been suggested of the  
342 influence of sample size on tests for selection under exponential population growth  
343 (Subramanian 2016). The effect of small effective population size and bottlenecks could  
344 be easily tested using similar methods as were applied in this study.

345 This study shows limits in the accuracy of coalescent models with respect to small  
346 effective population sizes and bottlenecked populations, including in combination with  
347 oversampling. Under these population conditions, standard coalescent models have the  
348 potential to produce misleading results and generate incorrect conclusions about  
349 population history and structure. In applications to empirical data, it is thus imperative to  
350 take into account how robust coalescent models may or may not be to violations of their  
351 assumptions.

352 Thus, standard coalescent models are inappropriate for developing null expectations of  
353 genetic diversity for many scenarios with small effective population sizes, especially  
354 soon after a bottleneck. This is particularly relevant to studies of species of conservation  
355 concern, in which small effective population sizes and bottlenecks are common  
356 (Allendorf 1986; Palstra and Ruzzante 2008), but may also be relevant to other species  
357 subject to oversampling or bottlenecks. This has implications for studies of species of  
358 conservation concern, because coalescent models that profoundly mischaracterize the  
359 timings of bottlenecks, population splits, and other demographic events could  
360 detrimentally influence management actions. In addition, these mischaracterizations are  
361 potentially pernicious in studies of disease population genetics, because repeated  
362 bottlenecks and intense selection are classic aspects of disease agent ecology.

363 **Acknowledgements**

364 Thanks go to Liliana. M. Dávalos and Krishna R. Veeramah for constructive discussions  
365 and comments. Simulations were performed on the Stony Brook University Seawulf  
366 HPC cluster and Indiana University HPC Mason and Carbonate clusters. This research  
367 was supported, in part, by an American Association of University Women Dissertation  
368 Fellowship to M. Elise Lauterbur, and NSF-DEB1456455 to Liliana M. Dávalos.

## 369 **References**

- 370 Alasaad, Samer, Ramón C. Soriguer, Galina Chelomina, Yury Petrovich Sushitsky, and  
371 Joerns Fickel. 2011. "Siberian Tiger's Recent Population Bottleneck in the  
372 Russian Far East Revealed by Microsatellite Markers." *Mammalian Biology* 76  
373 (6): 722–26. <https://doi.org/10.1016/j.mambio.2011.01.011>.
- 374 Allendorf, Fred W. 1986. "Genetic Drift and the Loss of Alleles versus Heterozygosity."  
375 *Zoo Biology* 5 (2): 181–90. <https://doi.org/10.1002/zoo.1430050212>.
- 376 Árnason, Einar, and Katrín Halldórsdóttir. 2015. "Nucleotide Variation and Balancing  
377 Selection at the *Ckma* Gene in Atlantic Cod: Analysis with Multiple Merger  
378 Coalescent Models." *PeerJ* 3 (February): e786. <https://doi.org/10.7717/peerj.786>.
- 379 Bhaskar, Anand, Andrew G. Clark, and Yun S. Song. 2014. "Distortion of Genealogical  
380 Properties When the Sample Is Very Large." *Proceedings of the National  
381 Academy of Sciences* 111 (6): 2385–90.  
382 <https://doi.org/10.1073/pnas.1322709111>.
- 383 Birkner, Matthias, and Jochen Blath. 2008. "Computing Likelihoods for Coalescents with  
384 Multiple Collisions in the Infinitely Many Sites Model." *Journal of Mathematical  
385 Biology* 57 (3): 435–65. <https://doi.org/10.1007/s00285-008-0170-6>.
- 386 Castro, Isabel, Karen M. Mason, Doug P. Armstrong, and David M. Lambert. 2004.  
387 "Effect of Extra-Pair Paternity on Effective Population Size in a Reintroduced  
388 Population of the Endangered Hihi, and Potential for Behavioural Management."  
389 *Conservation Genetics* 5 (3): 381–93.  
390 <https://doi.org/10.1023/B:COGE.0000031146.51681.b0>.
- 391 Eldon, Bjarki, Matthias Birkner, Jochen Blath, and Fabian Freund. 2015. "Can the Site-

- 392 Frequency Spectrum Distinguish Exponential Population Growth from Multiple-  
393 Merger Coalescents?” *Genetics* 199: 841–56.
- 394 Eldon, Bjarki, and John Wakeley. 2005. “Coalescent Processes When the Distribution of  
395 Offspring Number Among Individuals Is Highly Skewed.” *Genetics* 172 (4): 2621–  
396 33. <https://doi.org/10.1534/genetics.105.052175>.
- 397 Fu, Yun-Xin, and Wen-Hsiung Li. 1993. “Maximum Likelihood Estimation of Population  
398 Parameters.” *Genetics* 134: 1261–70.
- 399 Fu, Yun-Xun, and Wen-Hsiung Li. 1999. “Coalescing into the 21st Century: An  
400 Overview and Prospects of Coalescent Theory.” *Theoretical Population Biology*  
401 56 (1): 1–10. <https://doi.org/10.1006/tpbi.1999.1421>.
- 402 Haller, Benjamin C., and Philipp W. Messer. 2017. “SLiM 2: Flexible, Interactive  
403 Forward Genetic Simulations.” *Molecular Biology and Evolution* 34 (1): 230–40.  
404 <https://doi.org/10.1093/molbev/msw211>.
- 405 Haller, Benjamin C, and Philipp W Messer. 2019. “SLiM 3: Forward Genetic Simulations  
406 Beyond the Wright–Fisher Model.” Edited by Ryan Hernandez. *Molecular Biology  
407 and Evolution* 36 (3): 632–37. <https://doi.org/10.1093/molbev/msy228>.
- 408 Hernandez, R. D. 2008. “A Flexible Forward Simulator for Populations Subject to  
409 Selection and Demography.” *Bioinformatics* 24 (23): 2786–87.  
410 <https://doi.org/10.1093/bioinformatics/btn522>.
- 411 Hey, J., and E. Harris. 1999. “Population Bottlenecks and Patterns of Human  
412 Polymorphism.” *Molecular Biology and Evolution* 16 (10): 1423–26.  
413 <https://doi.org/10.1093/oxfordjournals.molbev.a026054>.
- 414 Hudson, R. R. 2002. “Generating Samples under a Wright-Fisher Neutral Model of



- 415 Genetic Variation.” *Bioinformatics* 18 (2): 337–38.  
416 <https://doi.org/10.1093/bioinformatics/18.2.337>.
- 417 Husband, Brian C., and Spencer C. H. Barrett. 1992. “Effective Population Size and  
418 Genetic Drift in Tristyloous *Eichhornia Paniculata* (Pontederiaceae).” *Evolution* 46  
419 (6): 1875–90. <https://doi.org/10.1111/j.1558-5646.1992.tb01175.x>.
- 420 Hutchinson, William F., Cock van Oosterhout, Stuart I. Rogers, and Gary R. Carvalho.  
421 2003. “Temporal Analysis of Archived Samples Indicates Marked Genetic  
422 Changes in Declining North Sea Cod ( *Gadus Morhua* ).” *Proceedings of the*  
423 *Royal Society of London. Series B: Biological Sciences* 270 (1529): 2125–32.  
424 <https://doi.org/10.1098/rspb.2003.2493>.
- 425 Irwin, K K, S Laurent, S Matuszewski, S Vuilleumier, L Ormond, H Shim, C Bank, and J  
426 D Jensen. 2016. “On the Importance of Skewed Offspring Distributions and  
427 Background Selection in Virus Population Genetics.” *Heredity* 117 (6): 393–99.  
428 <https://doi.org/10.1038/hdy.2016.58>.
- 429 Kingman, J. F. C. 1982a. “On the Genealogy of Large Populations.” *Journal of Applied*  
430 *Probability* 19: 27. <https://doi.org/10.2307/3213548>.
- 431 ———. 1982b. “The Coalescent.” *Stochastic Processes and Their Applications* 13:  
432 235–48. [https://doi.org/10.1016/0304-4149\(82\)90011-4](https://doi.org/10.1016/0304-4149(82)90011-4).
- 433 Koskela, Jere, Paul Jenkins, and Dario Spano. 2015. “Computational Inference beyond  
434 Kingman’s Coalescent.” *Journal of Applied Probability* 52 (2): 519–37.
- 435 Leberg, Paul L. 1992. “Effects of Population Bottlenecks on Genetic Diversity as  
436 Measured by Allozyme Electrophoresis.” *Evolution* 46 (2): 477–94. <https://doi.org/10.1111/j.1558-5646.1992.tb02053.x>.

- 438 Martin, Alicia R., Christopher R. Gignoux, Raymond K. Walters, Genevieve L. Wojcik,  
439 Benjamin M. Neale, Simon Gravel, Mark J. Daly, Carlos D. Bustamante, and  
440 Eimear E. Kenny. 2017. "Human Demographic History Impacts Genetic Risk  
441 Prediction across Diverse Populations." *The American Journal of Human  
442 Genetics* 100 (4): 635–49. <https://doi.org/10.1016/j.ajhg.2017.03.004>.
- 443 Maruyama, Takeo, and Paul A. Fuerst. 1985. "Population Bottlenecks and  
444 Nonequilibrium Models in Population Genetics. II. Number of Alleles in a Small  
445 Population That Was Formed by a Recent Bottleneck." *Genetics* 111: 675–89.
- 446 Mazet, O, W Rodríguez, S Grusea, S Boitard, and L Chikhi. 2016. "On the Importance  
447 of Being Structured: Instantaneous Coalescence Rates and Human Evolution—  
448 Lessons for Ancestral Population Size Inference?" *Heredity* 116 (4): 362–71.  
449 <https://doi.org/10.1038/hdy.2015.104>.
- 450 Mezzavilla, Massimo. 2015. "Neon: An R Package to Estimate Human Effective  
451 Population Size and Divergence Time from Patterns of Linkage Disequilibrium  
452 between SNPS." *Journal of Computer Science & Systems Biology* 8 (1).  
453 <https://doi.org/10.4172/jcsb.1000168>.
- 454 Mohle, Martin, and Serik Sagitov. 2003. "Coalescent Patterns in Diploid Exchangeable  
455 Population Models." *Journal of Mathematical Biology* 47 (4): 337–52.  
456 <https://doi.org/10.1007/s00285-003-0218-6>.
- 457 Montano, Valeria. 2016. "Coalescent Inferences in Conservation Genetics: Should the  
458 Exception Become the Rule?" *Biology Letters* 12 (6): 20160211.  
459 <https://doi.org/10.1098/rsbl.2016.0211>.
- 460 Palstra, Friso P., and Daniel E. Ruzzante. 2008. "Genetic Estimates of Contemporary

- 461 Effective Population Size: What Can They Tell Us about the Importance of  
462 Genetic Stochasticity for Wild Population Persistence?" *Molecular Ecology* 17  
463 (15): 3428–47. <https://doi.org/10.1111/j.1365-294X.2008.03842.x>.
- 464 Schweinsberg, Jason. 2000. "Coalescents with Simultaneous Multiple Collisions."  
465 *Electronic Journal of Probability* 5 (0). <https://doi.org/10.1214/EJP.v5-68>.
- 466 Subramanian, Sankar. 2016. "The Effects of Sample Size on Population Genomic  
467 Analyses – Implications for the Tests of Neutrality." *BMC Genomics* 17 (1).  
468 <https://doi.org/10.1186/s12864-016-2441-8>.
- 469 Tellier, Aurélien, and Christophe Lemaire. 2014. "Coalescence 2.0: A Multiple  
470 Branching of Recent Theoretical Developments and Their Applications."  
471 *Molecular Ecology* 23 (11): 2637–52. <https://doi.org/10.1111/mec.12755>.
- 472 Tenesa, A., P. Navarro, B. J. Hayes, D. L. Duffy, G. M. Clarke, M. E. Goddard, and P.  
473 M. Visscher. 2007. "Recent Human Effective Population Size Estimated from  
474 Linkage Disequilibrium." *Genome Research* 17 (4): 520–26.  
475 <https://doi.org/10.1101/gr.6023607>.
- 476 The 1000 Genomes Project Consortium, Richard A. Gibbs, Eric Boerwinkle, Harsha  
477 Doddapaneni, Yi Han, Viktoriya Korchina, Christie Kovar, et al. 2015. "A Global  
478 Reference for Human Genetic Variation." *Nature* 526 (7571): 68–74.  
479 <https://doi.org/10.1038/nature15393>.
- 480 Thornton, Kevin R. 2014. "A C++ Template Library for Efficient Forward-Time  
481 Population Genetic Simulation of Large Populations." *Genetics* 198 (1): 157–66.  
482 <https://doi.org/10.1534/genetics.114.165019>.
- 483 Wakeley, John. 2016. *Coalescent Theory: An Introduction*. Macmillan Learning.

- 484 Wakeley, John, and Nicolas Aliacar. 2001. "Gene Genealogies in a Metapopulation."  
485 *Genetics* 159: 893–905.
- 486 Wakeley, John, and Tsoyoshi Takahashi. 2003. "Gene Genealogies When the Sample  
487 Size Exceeds the Effective Size of the Population." *Molecular Biology and*  
488 *Evolution* 20 (2): 208–13. <https://doi.org/10.1093/molbev/msg024>.
- 489 Watterson, G.A. 1975. "On the Number of Segregating Sites in Genetical Models  
490 without Recombination." *Theoretical Population Biology* 7 (2): 256–76.  
491 [https://doi.org/10.1016/0040-5809\(75\)90020-9](https://doi.org/10.1016/0040-5809(75)90020-9).
- 492 Zhu, Sha, James H. Degnan, Sharyn J. Goldstien, and Bjarki Eldon. 2015. "Hybrid-  
493 Lambda: Simulation of Multiple Merger and Kingman Gene Genealogies in  
494 Species Networks and Species Trees." *BMC Bioinformatics* 16 (1).  
495 <https://doi.org/10.1186/s12859-015-0721-y>.
